# Supplementary material
Source: PubMed Central journal article supplement (PMC4671478)
Supplement: 878793eba08a9d737c730c4e8ce6dcfc_brain-2015-00500-File010.pdf [file 878793eba08a9d737c730c4e8ce6dcfc_brain-2015-00500-File010.pdf]

**Supplemental Table 8.** Lesion Network Mapping Results, Voxelwise Lieberman Test

|                          | ROI Peak, Comparing Actual versus Randomized Network Overlap (z value, p) | Average Voxel Intensity in ROI (z) | Average Voxel Intensity Outside of ROI (z) (P value – Comparison to ROI Average) |
|--------------------------|---------------------------------------------------------------------------|------------------------------------|----------------------------------------------------------------------------------|
| Peduncular Hallucinosi   | 8.71*, P < 10 <sup>-5</sup>                                               | 4.50                               | 0.74 +/- 1.3, P = 0.006                                                          |
| Auditory Hallucinosi     | 4.36*, P < 10 <sup>-4</sup>                                               | 1.95                               | 0.24 +/- 0.62, P = 0.008                                                         |
| Central Post-Stroke Pain | 7.52*, P < 10 <sup>-5</sup>                                               | 3.55                               | 0.17 +/- 1.21, P = 0.0074                                                        |
| Subcortical Aphasia      | 5.66*, P < 10 <sup>-5</sup>                                               | 3.39                               | 0.42 +/- 1.32, P = 0.029                                                         |

Abbreviations. ROI Region of interest

\* Z values over 2.33 were significant at a false discovery rate threshold of 5% for each syndrome

**Supplemental Table 9.** Lesion Network Mapping Results, T-Test

|                          | ROI Peak     | ROI Average Voxel Intensity | Average Voxel Intensity Outside of ROI (P value – Comparison to ROI Average) | Average Voxel Intensity in ROI from Random Lesions (P value – Comparison to ROI Average) |
|--------------------------|--------------|-----------------------------|------------------------------------------------------------------------------|------------------------------------------------------------------------------------------|
| Peduncular Hallucinosi   | 21/23 (95%)  | 16.89                       | 9.58 +/- 1.70, P = 0.00024                                                   | 2.69 +/- 3.33, P = 0.000046                                                              |
| Auditory Hallucinosi     | 14/15 (93%)  | 7.67                        | 1.65 +/- 2.25, P = 0.008                                                     | 4.20 +/- 1.41, P = 0.01                                                                  |
| Central Post-Stroke Pain | 17/23 (78%)  | 15.50                       | 2.90 +/- 3.68, P = 0.0009                                                    | 2.27 +/- 1.02, P = < 1x10 <sup>-9</sup>                                                  |
| Subcortical Aphasia      | 12/12 (100%) | 6.82                        | 2.66 +/- 3.21, P = 0.198                                                     | 1.58 +/- 0.69, P < 1 x 10 <sup>-4</sup>                                                  |

Abbreviations. ROI Region of interest

**Supplemental Table 10.** Lesion Network Mapping Results, Subtraction Analysis

|                          | ROI Peak (%), Comparing Actual versus Randomized Network Overlap | ROI AverageVoxel Intensity (%) | Average Voxel Intensity Outside of ROI (%) (P value – Comparison to ROI Average) |
|--------------------------|------------------------------------------------------------------|--------------------------------|----------------------------------------------------------------------------------|
| Peduncular Hallucinosi   | 59                                                               | 31                             | 4.45 +/- 9, P = 0.005                                                            |
| Auditory Hallucinosi     | 56                                                               | 24                             | 3.08 +/- 8.34, P = 0.015                                                         |
| Central Post-Stroke Pain | 69                                                               | 49                             | 3.5 +/- 13.9, P = 0.002                                                          |
| Subcortical Aphasia      | 78                                                               | 41                             | 9.29 +/- 19.21, P = 0.108                                                        |

Abbreviations. ROI Region of interest
