# Supplementary material
Source: PubMed Central journal article supplement (PMC4671478)
Supplement: e847ee47cdea17d8d3cd1622b08f2576_brain-2015-00500-File016.pdf [file e847ee47cdea17d8d3cd1622b08f2576_brain-2015-00500-File016.pdf]

# Subtraction Analysis

## Peduncular Hallucinosi

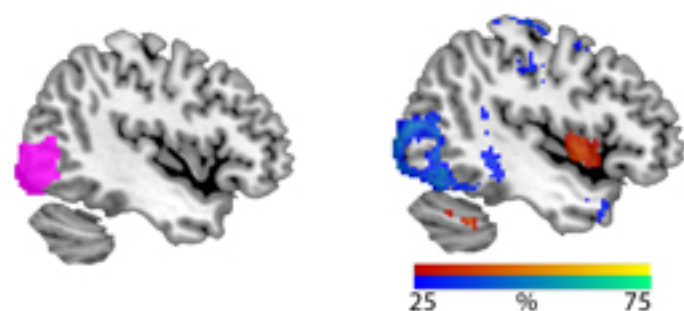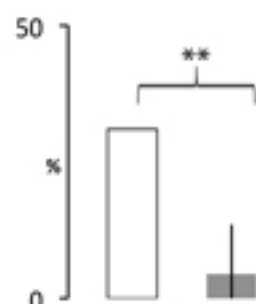

## Auditory Hallucinosi

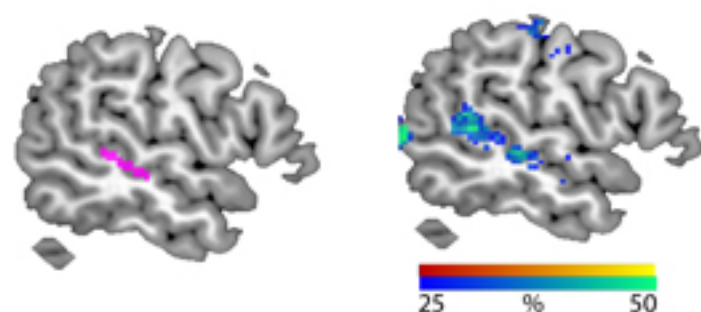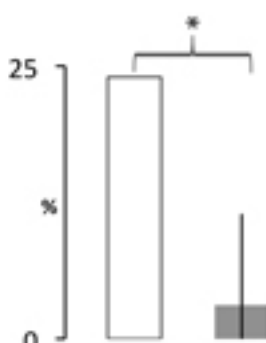

## Central Post-Stroke Pain

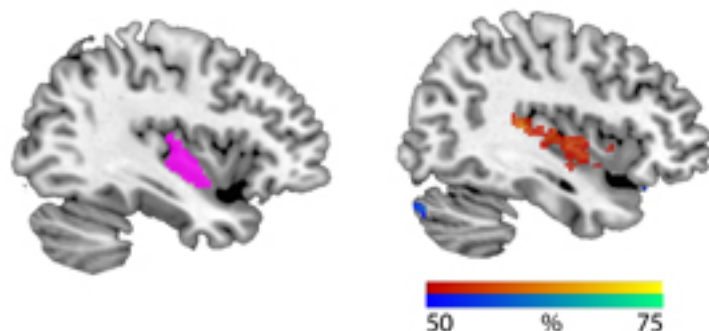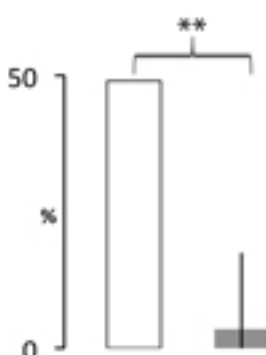

## Subcortical Aphasia

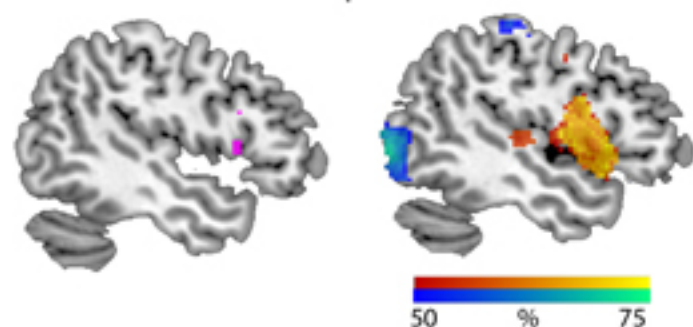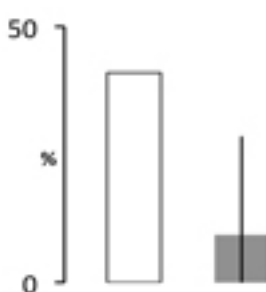

 A priori ROI for network results

 Positive correlation

 Negative correlation

 Average voxel intensity, actual > random, within ROI

 Average voxel intensity, actual > random, outside ROI
