# Supplementary material
Source: PubMed Central journal article supplement (PMC4671478)

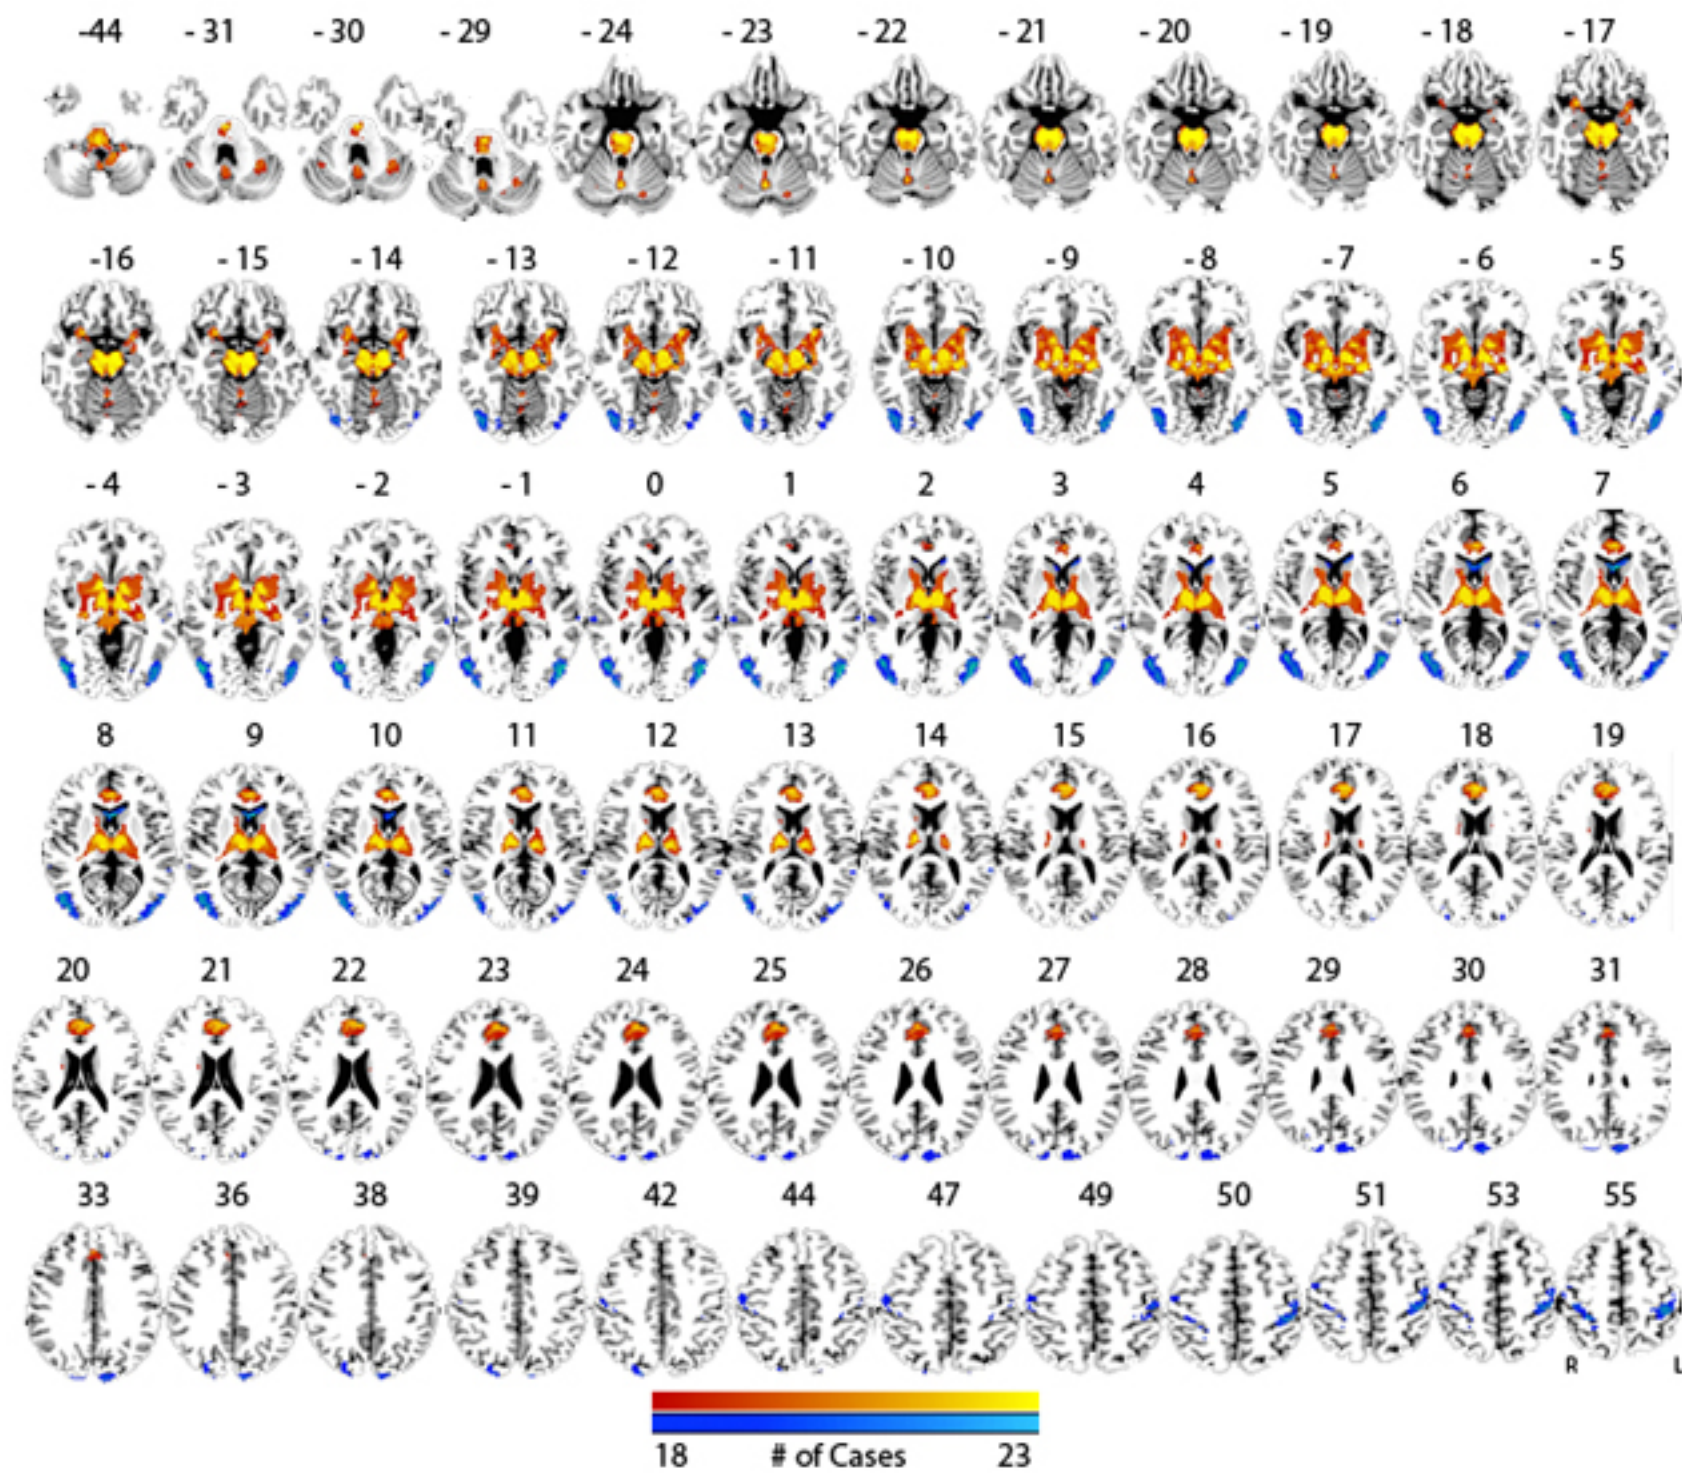

Supplement: 309131d4c018467eb4b902ffadb226e4_brain-2015-00500-File013.pdf [file 309131d4c018467eb4b902ffadb226e4_brain-2015-00500-File013.pdf]

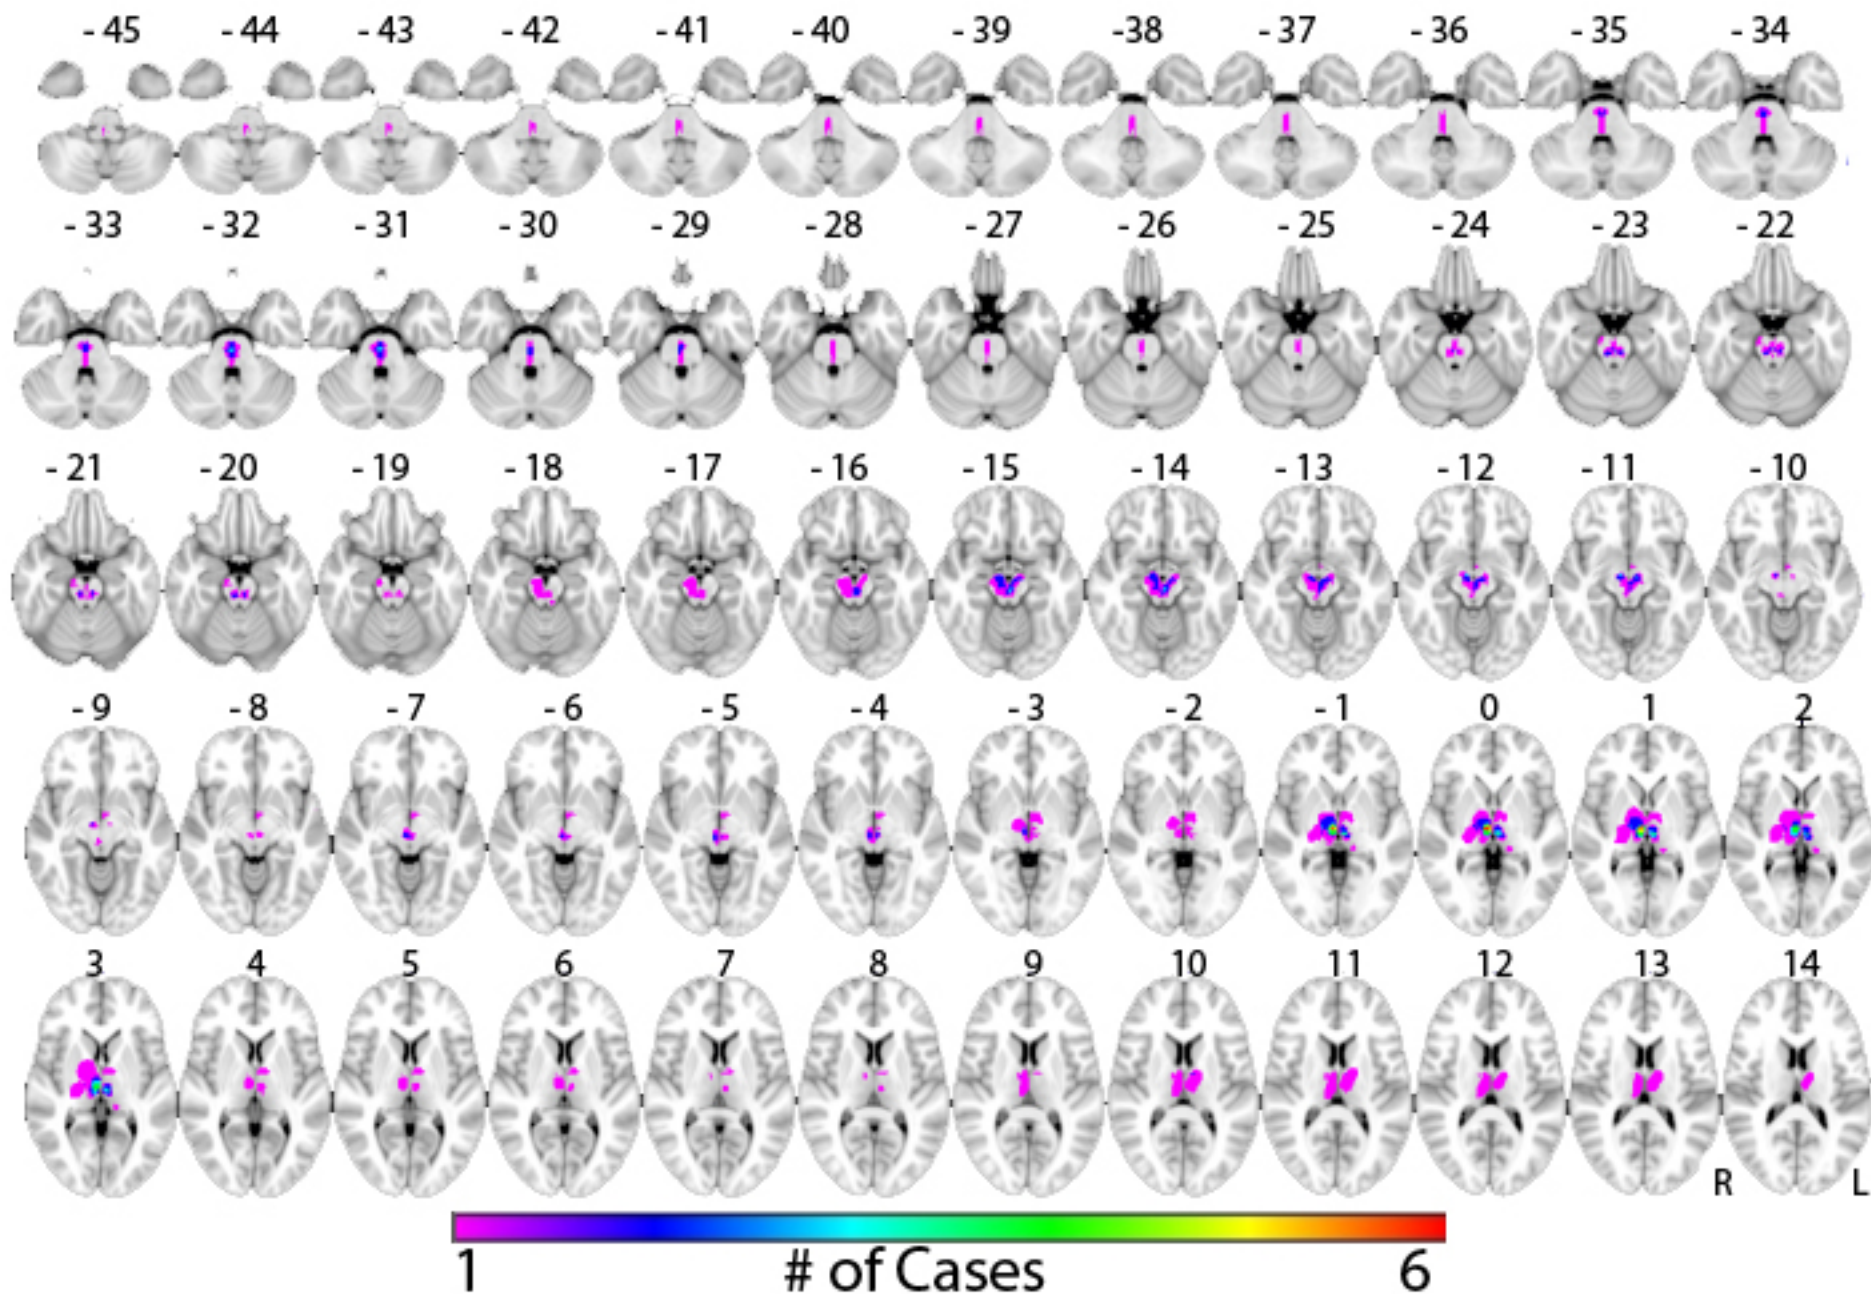

Supplement: 7b6ed5784a2af34f391941aaeb00e241_brain-2015-00500-File012.pdf [file 7b6ed5784a2af34f391941aaeb00e241_brain-2015-00500-File012.pdf]

A.

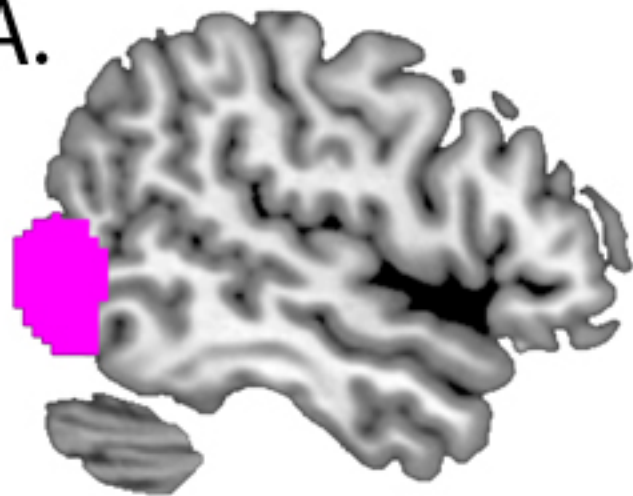

B.

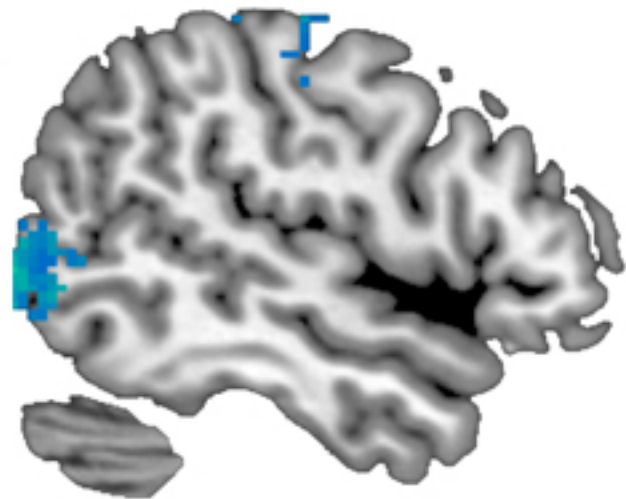

C.

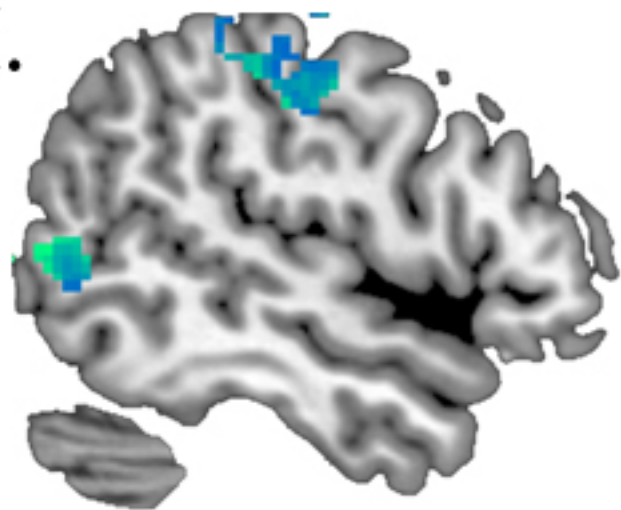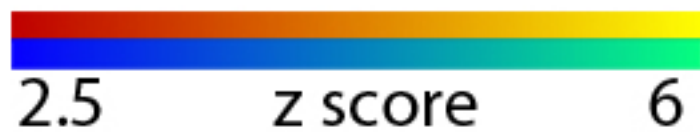

Supplement: b765b77eceab22592e5ad91e5519caa0_brain-2015-00500-File014.pdf [file b765b77eceab22592e5ad91e5519caa0_brain-2015-00500-File014.pdf]

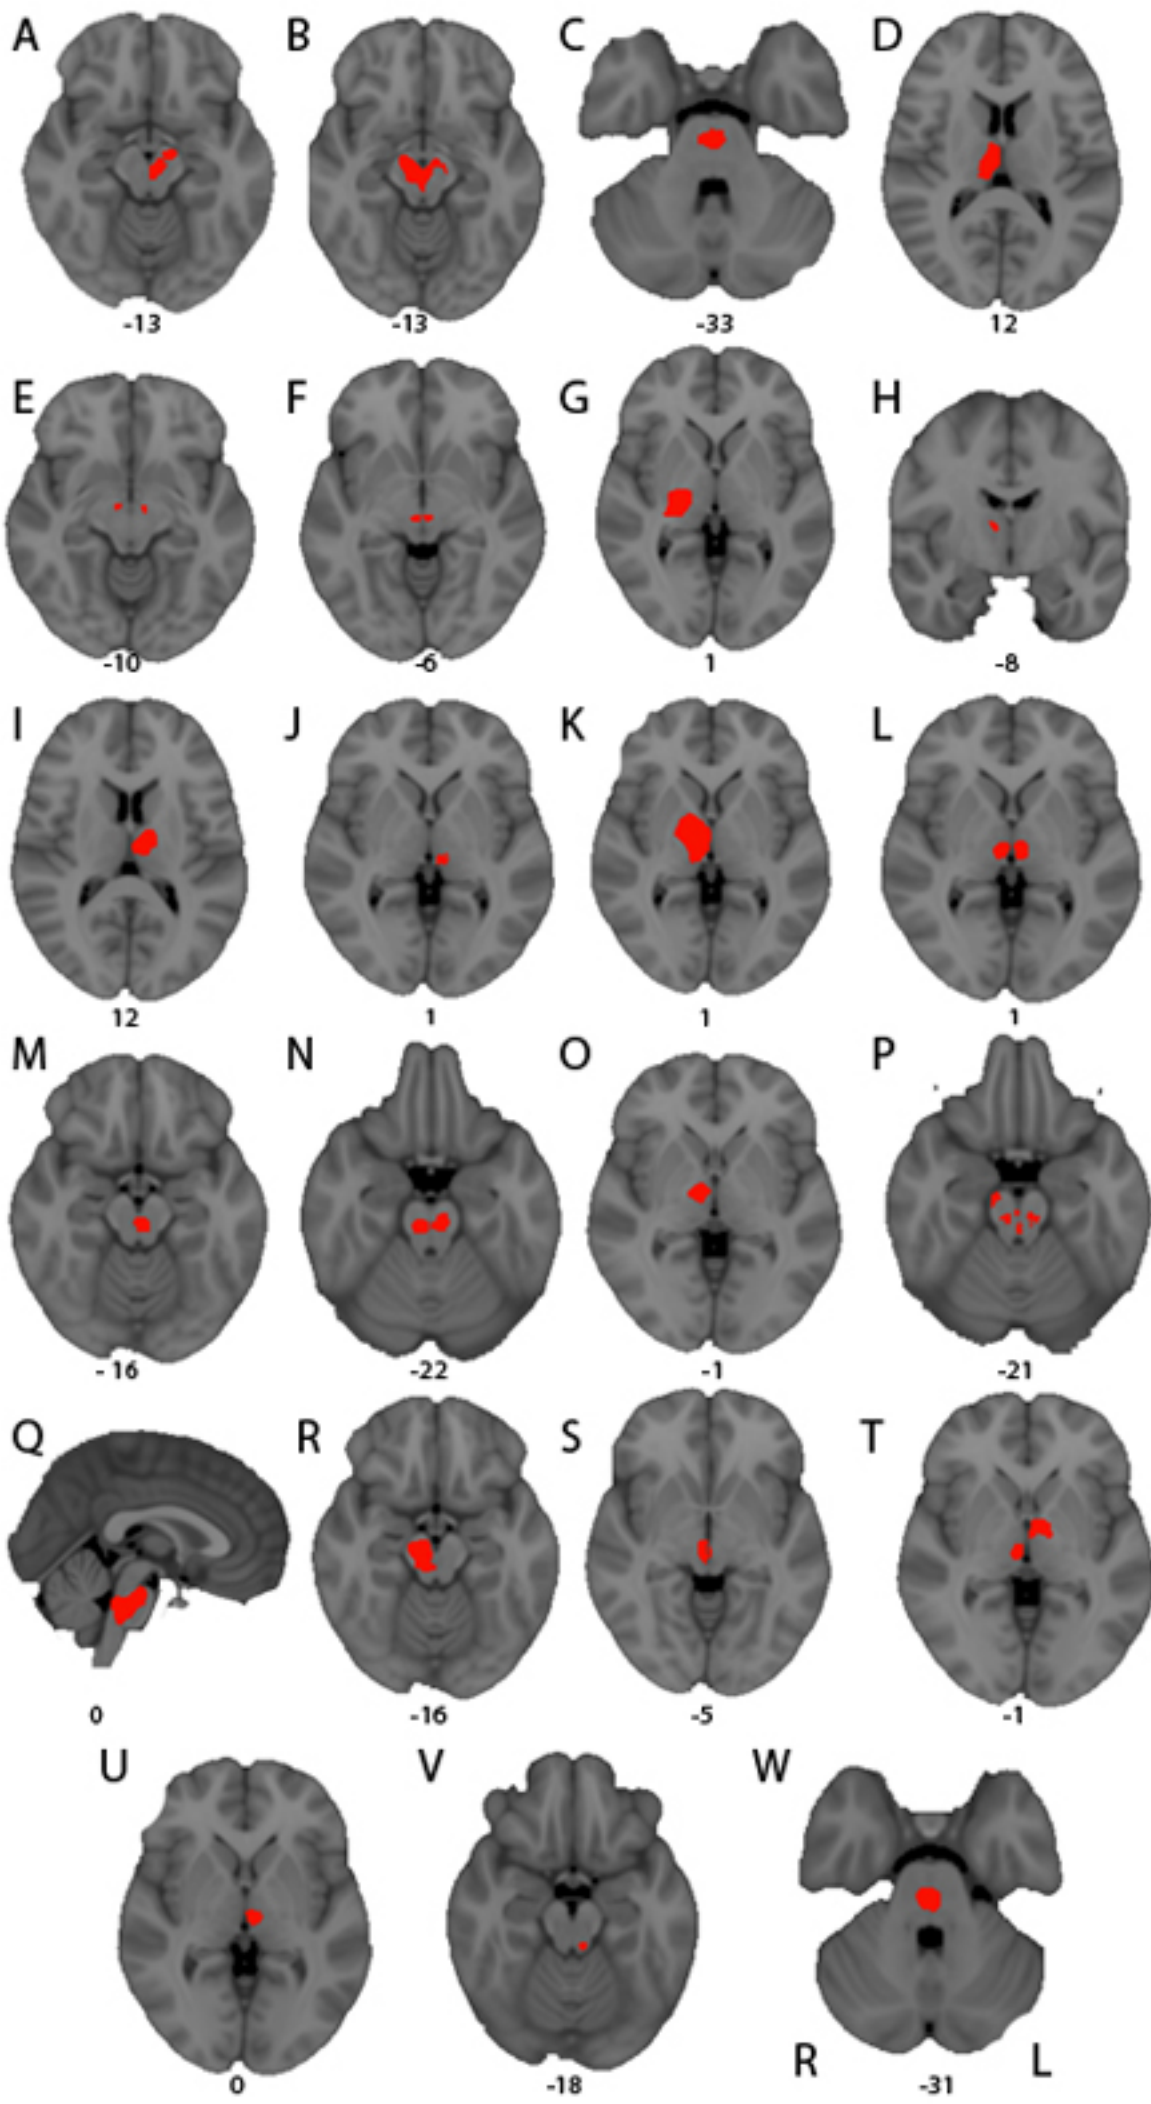

Supplement: ba1e6afffffdb66407d370d4d1da3e5a_brain-2015-00500-File011.pdf [file ba1e6afffffdb66407d370d4d1da3e5a_brain-2015-00500-File011.pdf]

A. 2D Pontine Lesion

B. 3D Pontine Lesion

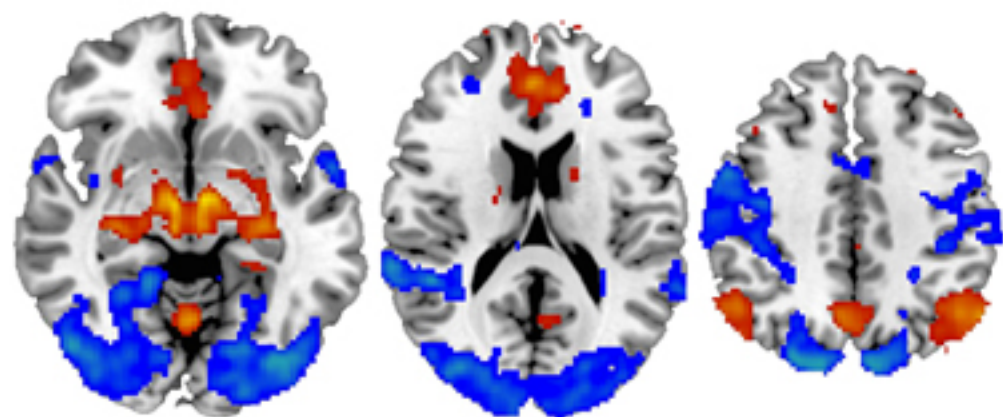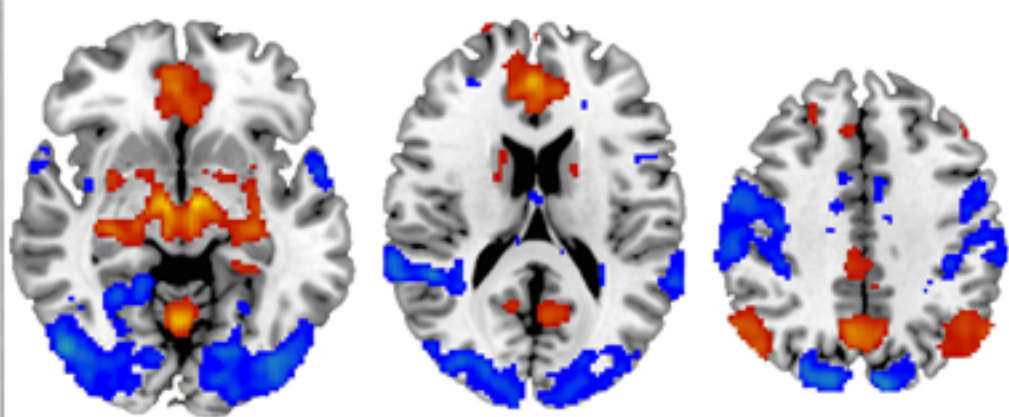

C. 2D Thalamic Lesion

D. 3D Thalamic Lesion

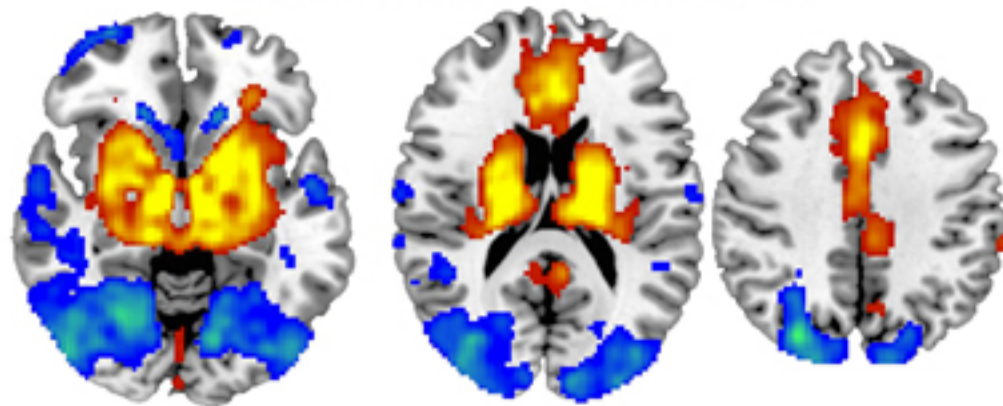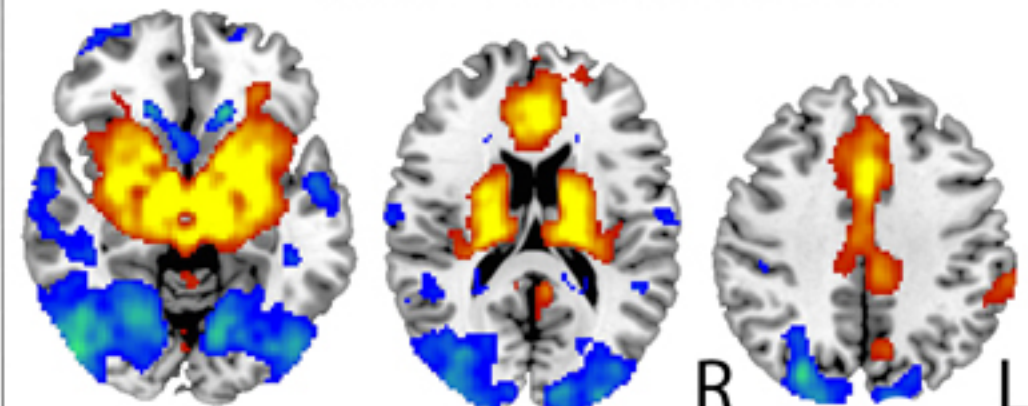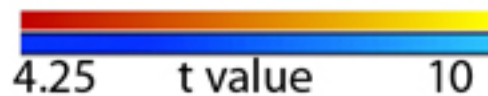

Supplement: e9f9b3d71df81ce5ed55c7ad4bcf453c_brain-2015-00500-File015.pdf [file e9f9b3d71df81ce5ed55c7ad4bcf453c_brain-2015-00500-File015.pdf]
